# Supplementary material for: What a (Young) Woman Wants: Concurrent Effects of Desire to Avoid Pregnancy and Desire for Sex on Sexual Intercourse and Contraceptive Use
Source: Oxford University Press journal article supplement (doi:10.1215/00703370-10295826), 2022-10-27
Supplement: eilers_esm.pdf [file eilers_esm.pdf]

**Appendices for**  
**What a (Young) Woman Wants: Concurrent Effects of Desire to Avoid Pregnancy and  
Desire for Sex on Sexual Intercourse and Contraceptive Use**

Michelle A. Eilers, MSc  
ORCID iD: **0000-0002-5373-2673**  
University of Texas at Austin

**Table A1** Multivariable Linear Regression with Random Effects Predicting Sexual Intercourse and Hormonal and Coital Contraceptive Use, Relationship Dynamics and Social Life

|                                              | Had Sex This Week   |                     | Used Hormonal Method |                    | If Had Sex<br>Used Coital Method |                    |
|----------------------------------------------|---------------------|---------------------|----------------------|--------------------|----------------------------------|--------------------|
|                                              |                     |                     |                      |                    |                                  |                    |
| Desire to avoid pregnancy <sup>a</sup>       | -0.01***<br>(0.002) | -0.01***<br>(0.002) | 0.02***<br>(0.002)   | 0.02***<br>(0.002) | 0.05***<br>(0.004)               | 0.04***<br>(0.004) |
| Desire for sex in the next year <sup>a</sup> | 0.03***<br>(0.003)  | 0.03***<br>(0.003)  | 0.02***<br>(0.002)   | 0.02***<br>(0.002) | -0.02***<br>(0.01)               | -0.02**<br>(0.01)  |
| <b>Interaction</b>                           |                     |                     |                      |                    |                                  |                    |
| Desire to avoid pregnancy * Desire for sex   | -                   | 0.001<br>(0.002)    | -                    | 0.01***<br>(0.002) | -                                | 0.01***<br>(0.003) |
| Constant                                     | 1.02<br>(0.62)      | 1.02<br>(0.62)      | -5.40***<br>(0.57)   | -5.38***<br>(0.57) | -0.79<br>(1.61)                  | -0.73<br>(1.60)    |
| Observations                                 | 54,872              | 54,872              | 54,069               | 54,069             | 9,345                            | 9,345              |
| Number of respondents                        | 924                 | 924                 | 923                  | 923                | 636                              | 636                |

*Notes:* Models control for all time-varying and time-invariant demographic background and social environmental characteristics. Models predicting coital contraceptive use include women who were not using a hormonal contraceptive method. Standard errors in parentheses.

<sup>a</sup> Measured as 0-5 in increasing desire and standardized to make coefficients comparable in terms of standard deviations.

\*\*\* p<0.001, \*\* p<0.01— (two-tailed tests)

**Table A2** Multivariable Linear Regression with Fixed Effects Predicting Sexual Intercourse and Hormonal and Coital Contraceptive Use by Desire to Avoid Pregnancy and Desire for Sex, Among Women with Varying Outcome Reports, Relationship Dynamics and Social Life Study

|                                              | Had Sex This Week  |                     | Used Hormonal Method |                    | If Had Sex<br>Used Coital Method |                   |
|----------------------------------------------|--------------------|---------------------|----------------------|--------------------|----------------------------------|-------------------|
|                                              |                    |                     |                      |                    |                                  |                   |
| Desire to avoid pregnancy <sup>a</sup>       | -0.01**<br>(0.003) | -0.01***<br>(0.003) | 0.02***<br>(0.003)   | 0.02***<br>(0.003) | 0.05***<br>(0.01)                | 0.04***<br>(0.01) |
| Desire for sex in the next year <sup>a</sup> | 0.04***<br>(0.003) | 0.04***<br>(0.003)  | 0.02***<br>(0.004)   | 0.02***<br>(0.004) | -0.04***<br>(0.01)               | -0.04**<br>(0.01) |
| Desire to avoid pregnancy x Desire for sex   | -                  | 0.006*<br>(0.002)   | -                    | 0.01***<br>(0.003) | -                                | 0.01<br>(0.005)   |
| Constant                                     | 1.35<br>(0.83)     | 1.36<br>(0.83)      | -7.74***<br>(0.93)   | -7.66***<br>(0.93) | -0.15<br>(2.66)                  | -0.02<br>(2.66)   |
| Observations                                 | 41,065             | 41,065              | 33,184               | 33,184             | 5,587                            | 5,587             |
| Number of respondents                        | 699                | 699                 | 541                  | 541                | 254                              | 254               |

*Notes:* Models include only women who vary in their outcome reports during the study; for example, the model predicting sex only includes women who reported having sex and reported not having sex in at least one week each during the study. This allows each woman to act as her own control case. Models control for all time-varying and time-invariant demographic background and social environmental characteristics. Models predicting coital contraceptive use include women who were not using a hormonal contraceptive method. Standard errors in parentheses.

<sup>a</sup> Measured as 0-5 in increasing desire and standardized to make coefficients comparable in terms of standard deviations.

\*\*\* p<.001, \*\* p<.01— (two-tailed tests)

**Figure A1** Predicted Probabilities of Sexual Intercourse, Hormonal Contraceptive Use, and Coital Contraceptive Use by Desire to Avoid Pregnancy and Desire for Sex, Among Women with Varying Outcome Reports, Relationship Dynamics and Social Life Study

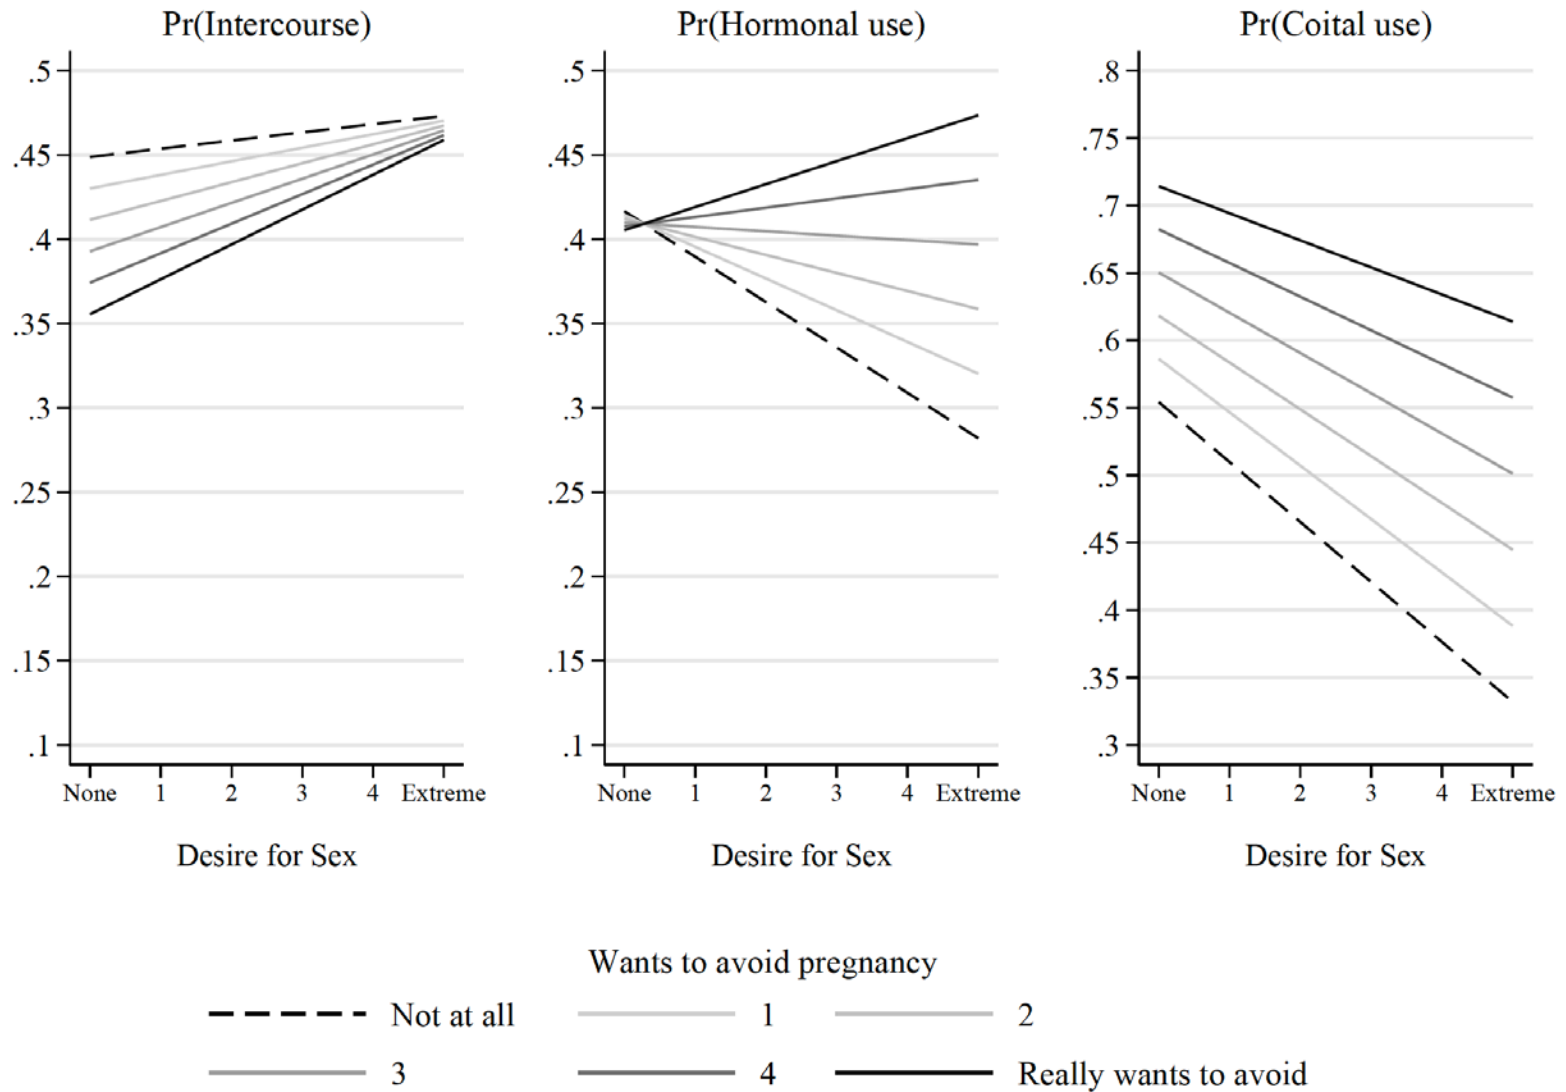

**Table A3** Multivariable Linear Regression with Fixed Effects Predicting Sexual Intercourse and Hormonal and Coital Contraceptive Use, Among Black Respondents, Relationship Dynamics and Social Life Study

|                                              | Had Sex This Week |                   | Used Hormonal Method |                   | If Had Sex<br>Used Coital Method |                    |
|----------------------------------------------|-------------------|-------------------|----------------------|-------------------|----------------------------------|--------------------|
|                                              |                   |                   |                      |                   |                                  |                    |
| Desire to avoid pregnancy <sup>a</sup>       | -0.01<br>(0.004)  | -0.01<br>(0.004)  | 0.01*<br>(0.003)     | 0.01*<br>(0.004)  | 0.02**<br>(0.01)                 | 0.02**<br>(0.01)   |
| Desire for sex in the next year <sup>a</sup> | 0.03***<br>(0.01) | 0.03***<br>(0.01) | 0.01**<br>(0.004)    | 0.01**<br>(0.003) | -0.05***<br>(0.01)               | -0.05***<br>(0.01) |
| Desire to avoid pregnancy x Desire for sex   | -                 | 0.003<br>(0.004)  | -                    | 0.001<br>(0.003)  | -                                | 0.002<br>(0.01)    |
| Constant                                     | -0.06*<br>(0.03)  | -0.06*<br>(0.03)  | 0.05<br>(0.03)       | 0.05<br>(0.03)    | 1.04***<br>(0.14)                | 1.04***<br>(0.14)  |
| Observations                                 | 14,685            | 14,685            | 14,334               | 14,334            | 2,609                            | 2,609              |
| Number of respondents                        | 314               | 314               | 314                  | 314               | 219                              | 219                |

*Notes:* Models control for all time-varying demographic background and social environmental characteristics. Models predicting coital contraceptive use include women who were not using a hormonal contraceptive method. Standard errors in parentheses.

<sup>a</sup> Measured as 0-5 in increasing desire and are standardized to make coefficients comparable in terms of standard deviations.

\*\*\* p<0.001, \*\* p<0.01, \* p<0.05— (two-tailed tests)

**Table A4** Multivariable Linear Regression with Fixed Effects Predicting Sexual Intercourse and Hormonal and Coital Contraceptive Use, Among White Respondents <sup>a</sup>, Relationship Dynamics and Social Life Study

|                                              | Had Sex This Week   |                     | Used Hormonal Method |                    | If Had Sex<br>Used Coital Method |                   |
|----------------------------------------------|---------------------|---------------------|----------------------|--------------------|----------------------------------|-------------------|
|                                              |                     |                     |                      |                    |                                  |                   |
| Desire to avoid pregnancy <sup>b</sup>       | -0.01***<br>(0.003) | -0.01***<br>(0.003) | 0.02***<br>(0.002)   | 0.02***<br>(0.003) | 0.05***<br>(0.004)               | 0.05***<br>(0.01) |
| Desire for sex in the next year <sup>b</sup> | 0.03***<br>(0.003)  | 0.03***<br>(0.003)  | 0.02***<br>(0.003)   | 0.02***<br>(0.02)  | -0.02*<br>(0.01)                 | -0.01<br>(0.01)   |
| Desire to avoid pregnancy x Desire for sex   | -                   | 0.004<br>(0.003)    | -                    | 0.01***<br>(0.002) | -                                | 0.01**<br>(0.004) |
| Constant                                     | -0.08***<br>(0.02)  | -0.07***<br>(0.02)  | 0.04*<br>(0.02)      | 0.04*<br>(0.02)    | 0.82***<br>(0.09)                | 0.83***<br>(0.09) |
| Observations                                 | 40,179              | 40,179              | 39,733               | 39,733             | 6,735                            | 6,735             |
| Number of respondents                        | 610                 | 610                 | 609                  | 609                | 417                              | 417               |

*Notes:* Models control for all time-varying demographic background and social environmental characteristics. Models predicting coital contraceptive use include women who were not using a hormonal contraceptive method. Standard errors in parentheses.

<sup>a</sup> Women who identify neither as Black nor White constitute 3% of the sample and are included with white women. Results are substantively the same with only white women. <sup>b</sup> Measured as 0-5 in increasing desire and are standardized to make coefficients comparable in terms of standard deviations.

\*\*\* p<0.001, \*\* p<0.01, \* p<0.05— (two-tailed tests)

**Table A5** Multivariable Multinomial Regression Predicting Sexual Intercourse and Hormonal and Coital Contraceptive Use Jointly, Relationship Dynamics and Social Life Study

|                                                  | No Sex<br>This<br>Week | Had Sex,<br>No<br>Contra-<br>ception | Sex With<br>Coital<br>Method<br>Only | Sex With<br>Hormonal<br>Method<br>Only | Sex with<br>Hormonal<br>& Coital<br>Method |
|--------------------------------------------------|------------------------|--------------------------------------|--------------------------------------|----------------------------------------|--------------------------------------------|
| <i>Reference: No sex this week</i>               |                        |                                      |                                      |                                        |                                            |
| Desire to avoid pregnancy                        | --                     | -0.31***<br>(0.06)                   | 0.01<br>(0.06)                       | 0.29*<br>(0.14)                        | 0.30***<br>(0.08)                          |
| Desire for sex in the next year                  | --                     | 0.74***<br>(0.12)                    | 0.37***<br>(0.06)                    | 0.83***<br>(0.13)                      | 0.55***<br>(0.08)                          |
| Constant                                         | --                     | 42.28<br>(29.12)                     | 10.54<br>(19.59)                     | -5.20<br>(27.77)                       | -20.63<br>(21.04)                          |
| <i>Reference: Sex without contraceptives</i>     |                        |                                      |                                      |                                        |                                            |
| Desire to avoid pregnancy                        | 0.31***<br>(0.06)      | --                                   | 0.32***<br>(0.06)                    | 0.60***<br>(0.14)                      | 0.61***<br>(0.08)                          |
| Desire for sex in the next year                  | -0.74***<br>(0.12)     | --                                   | -0.37**<br>(0.11)                    | 0.09<br>(0.15)                         | -0.20<br>(0.13)                            |
| Constant                                         | -42.28<br>(29.12)      | --                                   | -31.74<br>(30.56)                    | -47.48<br>(39.70)                      | -62.91<br>(34.41)                          |
| <i>Reference: Sex with coital method only</i>    |                        |                                      |                                      |                                        |                                            |
| Desire to avoid pregnancy                        | -0.01<br>(0.06)        | -0.32***<br>(0.06)                   | --                                   | 0.28*<br>(0.14)                        | 0.29***<br>(0.08)                          |
| Desire for sex in the next year                  | -0.37***<br>(0.06)     | 0.37**<br>(0.11)                     | --                                   | 0.46***<br>(0.13)                      | 0.17*<br>(0.08)                            |
| Constant                                         | -10.54<br>(19.59)      | 31.74<br>(30.56)                     | --                                   | -15.74<br>(32.54)                      | -31.17<br>(25.98)                          |
| <i>Reference: Sex with hormonal method only</i>  |                        |                                      |                                      |                                        |                                            |
| Desire to avoid pregnancy                        | -0.29*<br>(0.14)       | -0.60***<br>(0.14)                   | -0.28*<br>(0.14)                     | --                                     | 0.02<br>(0.13)                             |
| Desire for sex in the next year                  | -0.83***<br>(0.13)     | -0.09<br>(0.15)                      | -0.46***<br>(0.13)                   | --                                     | -0.28*<br>(0.13)                           |
| Constant                                         | 5.20<br>(27.77)        | 47.48<br>(39.70)                     | 15.74<br>(32.54)                     | --                                     | 15.43<br>(31.23)                           |
| <i>Reference: Sex with hormonal &amp; coital</i> |                        |                                      |                                      |                                        |                                            |
| Desire to avoid pregnancy                        | -0.30***<br>(0.08)     | -0.61***<br>(0.08)                   | -0.29***<br>(0.08)                   | -0.02<br>(0.13)                        | --                                         |
| Desire for sex in the next year                  | -0.55***<br>(0.08)     | 0.20<br>(0.13)                       | -0.17*<br>(0.08)                     | 0.28*<br>(0.13)                        | --                                         |
| Constant                                         | 20.63<br>(21.04)       | 62.91<br>(34.41)                     | 31.17<br>(25.98)                     | 15.43<br>(31.23)                       | --                                         |
| Observations                                     | 54,872                 | 54,872                               | 54,872                               | 54,872                                 | 54,872                                     |
| Number of respondents                            | 924                    | 924                                  | 924                                  | 924                                    | 924                                        |

Notes: Models control for all time-varying demographic background and social environmental characteristics. Desire to avoid pregnancy (i.e. pregnancy disinclination) and desire for sex are measured as 0-5 in increasing desire and are standardized to make coefficients comparable in terms of standard deviations. Standard errors in parentheses.

\*\*\* p<0.001, \*\* p<0.01, \* p<0.05— (two-tailed tests)
